# Supplementary material for: Systematic Characterization of Circular RNA-Associated CeRNA Network Identified Novel circRNA Biomarkers in Alzheimer's Disease
Source: Front Bioeng Biotechnol. 2019 Sep 11;7:222. doi: 10.3389/fbioe.2019.00222 (PMC6749152; doi:10.3389/fbioe.2019.00222)
Supplement: Supplementary File 2 — The differentially expressed miRNA list. [file Table_2.XLSX]

## Sheet: Sheet1
hsa-miR-30184
hsa-miR-617
hsa-miR-188
hsa-miR-101
hsa-miR-06383
hsa-miR-10912
hsa-miR-20546
hsa-miR-601
hsa-miR-29b
hsa-miR-181c
hsa-miR-23974
hsa-miR-08570
hsa-miR-10939
hsa-miR-42448
hsa-miR-19790
hsa-miR-44608
hsa-miR-02532
hsa-miR-35456
hsa-5S-b2
hsa-miR-12497
hsa-miR-134
hsa-miR-582
hsa-miR-15a
hsa-miR-374
hsa-miR-671
hsa-miR-320
hsa-miR-95
hsa-miR-575
hsa-miR-05109
hsa-miR-30e-5p
hsa-miR-572
hsa-miR-148b
hsa-miR-45605
hsa-miR-130a
hsa-miR-765
hsa-miR-598
hsa-miR-376a
hsa-miR-29c
hsa-miR-12504
hsa-miR-18895
hsa-miR-494
hsa-miR-432
hsa-miR-382
hsa-miR-20b
hsa-miR-185
hsa-miR-486
hsa-miR-28648
hsa-miR-368
